# Supplementary material for: Self-assembled tetramethyl cucurbit[6]uril–polyoxometalate nanocubes as efficient and recyclable catalysts for the preparation of propyl gallate
Source: Royal Society of Chemistry journal article supplement (doi:10.1039/d0nj01755h), 2020-01-01
Supplement: d0nj01755h1.pdf [file d0nj01755h1.pdf]

## Supporting information

### ***Self-Assembled Tetramethylcucurbit[6]uril-Polyoxometalate Nanocubes as Efficient and Recyclable Catalysts for Preparation of Propyl gallate***

Shuang Li, Wen Xia, Yunqian Zhang\*, Zhu Tao

<sup>1</sup>Key Laboratory of Macrocyclic and Supramolecular Chemistry of Guizhou Province,  
Guizhou University,  
Guiyang 550025, China

\*Corresponding to: [sci.yqzhang@gzu.edu.cn](mailto:sci.yqzhang@gzu.edu.cn) (Y. Q. Zhang)

## Experimental Section

**Materials:** TMeQ[6] was prepared by procedures reported elsewhere<sup>1</sup>. Phosphomolybdic acid (PMA) was purchased from Sigma-Aldrich. Gallic acid and n-propanol were obtained from Beijing Chemical Reagent Company (Beijing, China). All reagents were used as received without further purification.

**Preparation of TMeQ[6]-PMA NCs:** TMeQ[6]-PMA NCs were synthesized via an facile one-step self-assembly reaction between TMeQ[6] and PMA in a solution system. For the typical preparation, 0.1 g TMeQ[6] and 0.347 g PMA were dissolved in 100 mL distilled water and then mixed in the solution with magnetic stirring for 2 h. Subsequently, the products were collected by centrifugation and washed several times with distilled water, and freeze-dried. .

**Characterization:** The thermal properties of the conjugated microporous polymers were evaluated by thermogravimetric analysis (TGA) on a differential thermal analysis instrument (Q1000DSC +LNCS+FACS Q600SDT) over the temperature ranging from 30 to 800 °C with a heating rate of 10 °C min<sup>-1</sup> under an N<sub>2</sub> atmosphere. The morphologies of the resulting samples were observed by field-emission scanning electron microscopy (FESEM, Hitachi SU8010). Transmission electron microscopy (TEM) measurements were conducted on a JEM-2010 microscope operated at 200 kV. The crystallographic structure was measured by X-ray diffraction measurements (XRD, Rigaku, D/max-RB). The N<sub>2</sub> adsorption-desorption isotherms were performed using an automated gas sorption analyzer (Autosorb-iQ-2MP, Quantachrome, USA). Temperature-programmed desorption of NH<sub>3</sub> (NH<sub>3</sub>-TPD) were conducted on the AutoChem II. 2920 instrument (Micromeritics, USA) equipped with a mass spectrum detector. The sample (100 mg) was reduced at 573 K for 2 h in H<sub>2</sub>/Ar atmosphere, followed by purging with a high purity He flow for 2.0 h at 583 K. When the

temperature decreased to 323 K, NH<sub>3</sub> was introduced until saturation, followed by purging He for 90 min to remove physisorbed NH<sub>3</sub>. Finally, the sample was heated from 323 K to 973 K at a rate of 10 K min<sup>-1</sup>, and the released NH<sub>3</sub> was monitored by a mass spectrometer. Acid site type was analyzed on Nicolet 6700 spectrometer by using pyridine as the probe molecule (Py-FTIR). Before analysis, the as-prepared sample was activated at 200 °C within 5.33 × 10<sup>-2</sup> Pa for 1 h.

**Catalyst testing:** Catalytic performance was evaluated by esterification of gallic acid and n-propanol to propyl gallate (PG). Typically, gallic acid and n-propanol were magnetically stirred in a 250 mL conical flask equipped with condenser. When the mixture was heated to designed temperature, catalyst was added and stirred for duration time. Afterwards, catalyst was separated via centrifugation and the isolated mixture was placed into separating funnel for 10 h. The catalytic activity was determined by the conversion of acid value reduction as depicted in Eq. (1) and acid value was measured by GB/T 1668-2008 standards <sup>2</sup>.

$$\text{Conversion (\%)} = \frac{\text{acid value (initial)} - \text{acid value (final)}}{\text{acid value (initial)}} \times 100\% \quad (1)$$

The structure was identified by the infrared spectra and nuclear magnetic resonance spectra.

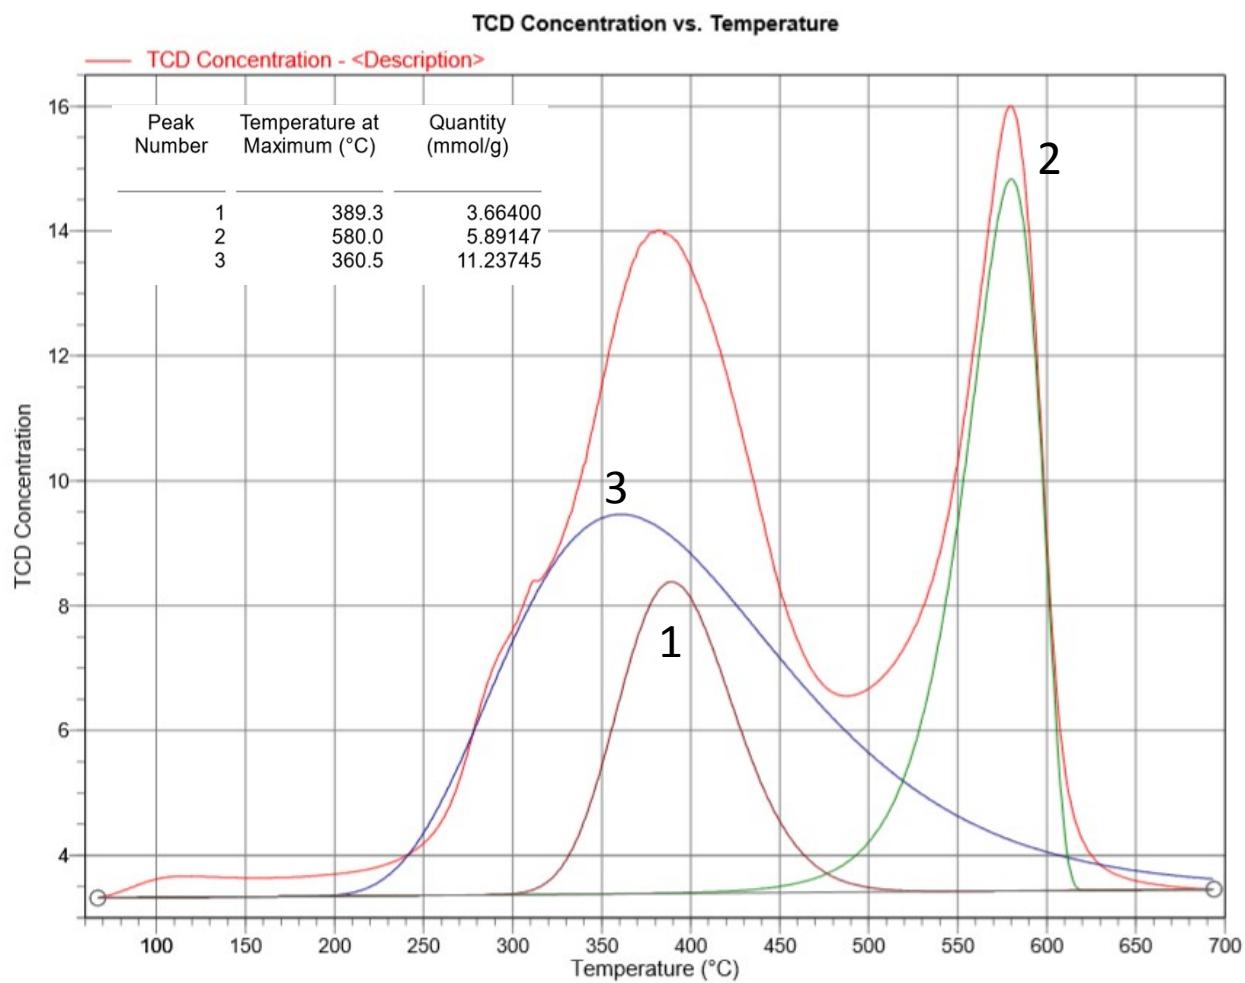

**Figure S1.** The desorption temperature profiles and the amounts of desorption ammonia of the TMeQ[6]-PMA NCs based on temperature programmed desorption experiments.

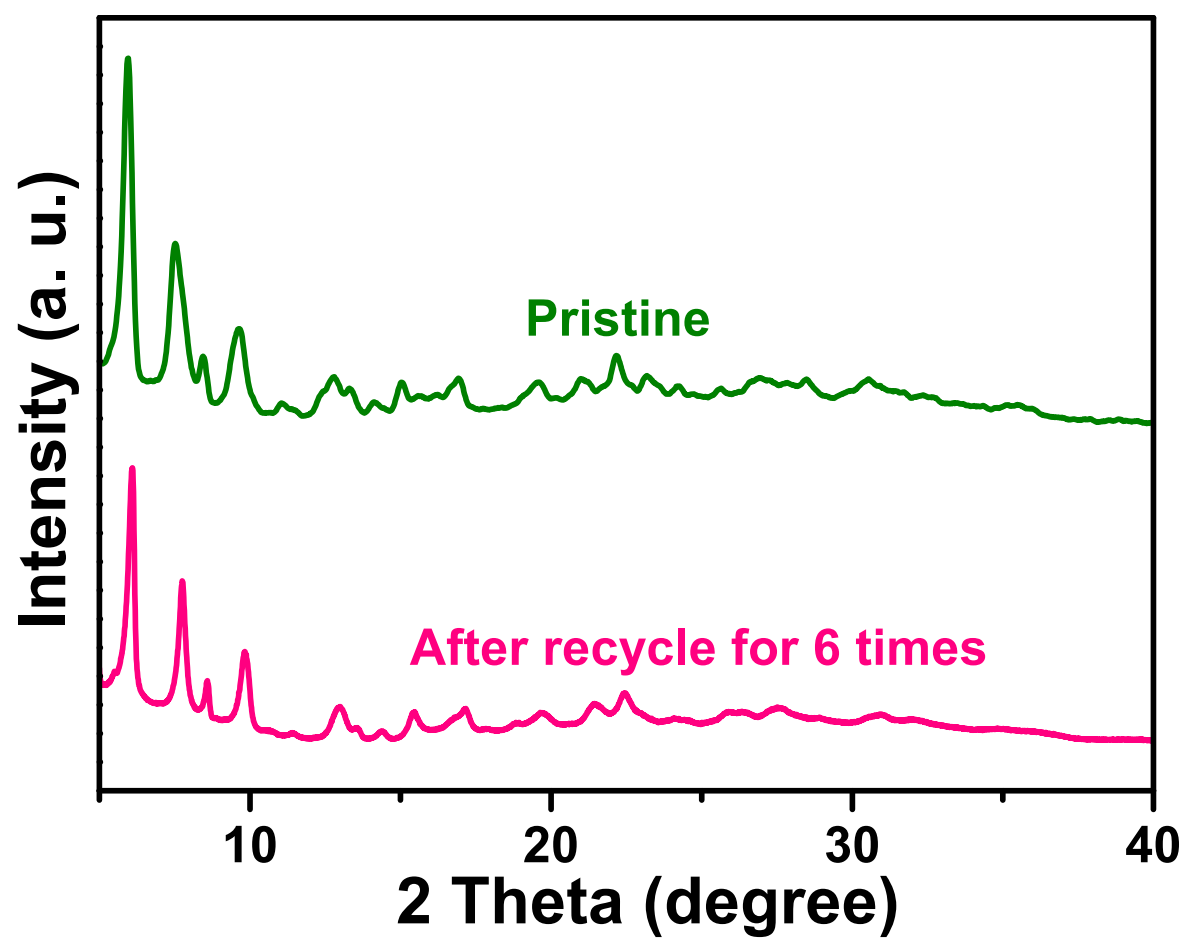

**Figure S2.** PXRD of TMeQ[6]-PMA NCs before and after recycle for six times.

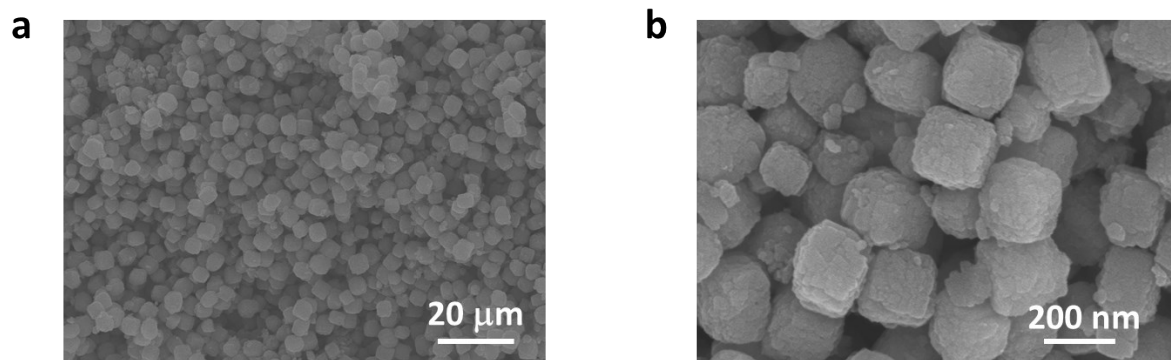

**Figure S3.** SEM of TMeQ[6]-PMA NCs after recycle for six times.

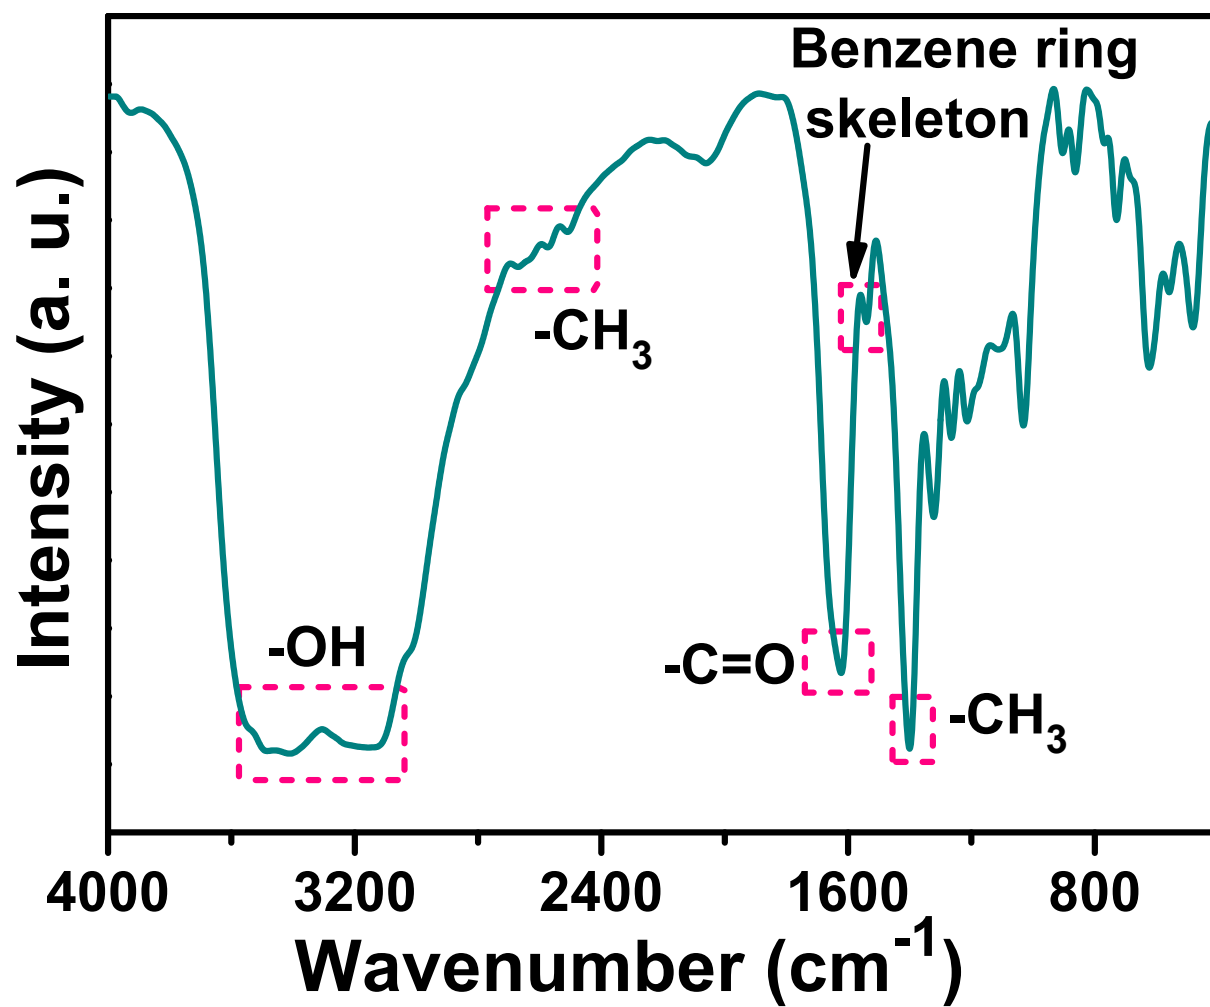

Figure S4. FTIR spectra of product.

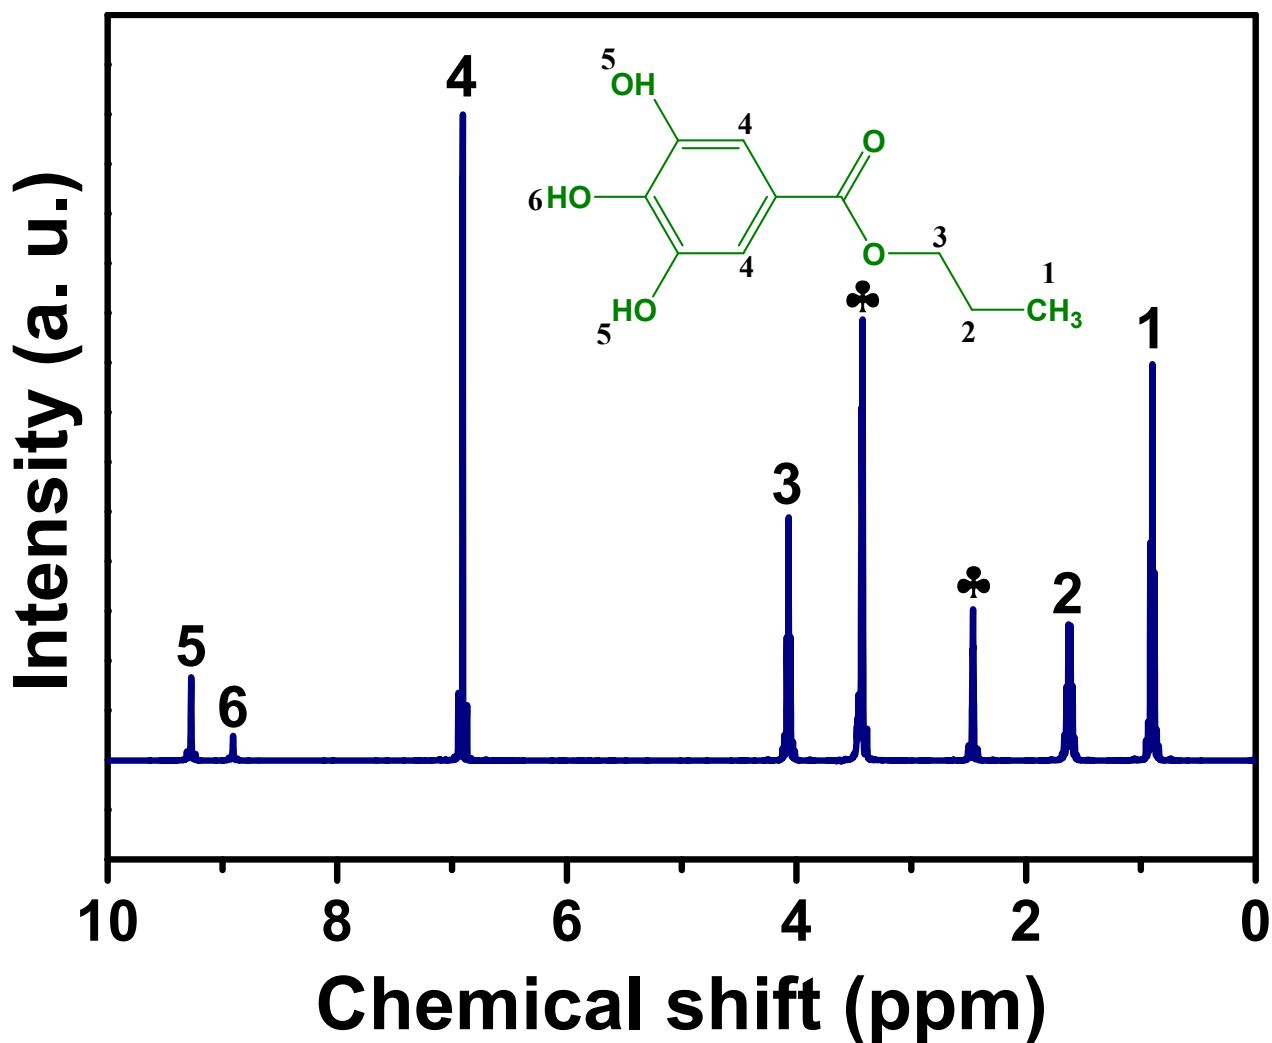

**Figure S4.** liquid-state <sup>1</sup>H magnetic resonance (NMR) spectra of product.

**Table S1.** The elemental analysis of as-prepared TMeQ[6]-PMA NCs

| Element | Atomic (%) |
|---------|------------|
| C       | 29.71      |
| N       | 17.99      |
| O       | 37.93      |
| P       | 1.13       |
| Mo      | 13.24      |
| Total   | 100        |



**Table S2.** Comparison of PG Yield based on different catalysts in propyl gallate synthesis.

| Catalysts                            | Yield of PG | References |
|--------------------------------------|-------------|------------|
| H <sub>2</sub> SO <sub>4</sub>       | 56.5%       | 3          |
| [Hnmp]HSO <sub>4</sub>               | 84.3%       | 3          |
| MgFe <sub>2</sub> O <sub>4</sub> NPs | 82%         | 4          |
| <i>L. plantarum</i>                  | 45%         | 5          |
| <i>Aspergillus niger</i>             | 43%         | 6          |
| <i>Aspergillus oryzae</i>            | 90%         | 7          |
| <i>Aspergillus niger</i>             | 65%         | 8          |
| TMeQ[6]-PMA NCs                      | 95.6%       | This work  |

## References

- 1 Y. J. Zhao, S. F. Xue, Q. J. Zhu, Z. Tao, J. X. Zhang, Z. B. Wei, L. S. Long, M. L. Hu, H. P. Xiao and A. I. Day, *Chin. Sci. Bull.*, 2004, **49**, 1111.
- 2 G. Corro, F. Banuelos, E. Vidal and S. Cebada, *Fuel.*, 2014, **115**, 625.
- 3 C. Zhang, X. Y. Pan, M. J. Yu, L. Jing and G. Wu, *Chem. Eng. J.*, 2012, **209**, 464.
- 4 A. Sharma, A. Kumar, K.R. Meena, S. Rana, M. Singh and S.S. Kanwar, *J. King Saud Univ. Sci.* 2017, **29**, 536.
- 5 F. L. Gloria, M. B. Juan, R. M. Javier, A. C. Jose, M. Rosario, D. L. R. Blanca, V. C. Alfonso and M. G. Jose, *Food. Chem.*, 2011, **128**, 214.
- 6 G. J. Nie, Z. M. Zheng, W. J. Yue, Y. Liu, H. Liu, P. Wang, G. H. Zhao, W. R. Cai and Z. L. Xue, *Process. Biochem.*, 2014, **49**, 277.
- 7 G. J. Nie, H. Liu, Z. Chen, P. Wang, G. H. Zhao and Z. M. Zheng, *J. Mol. Catal. B Enzym.* 2012, **82**, 102.
- 8 X. W. Yu, Y. Q. Li and S. M. Zhou, *J. Microbiol. Biotechnol.*, 2007, **23**, 1091.
